# Supplementary material for: Assessing the Accuracy of a Three-Year High-Resolution Mesoscale Wind Farm Wake Simulation with Lidar and Satellite Radar Data
Source: Copernicus journal article supplement (doi:10.5194/wes-2025-202), 2025-10-17
Supplement: Supplementary file 2 [file fig02.pdf › high-res-figs/fig02.pdf]

# SAR images

(A<sub>1</sub>) 2020-09-19 17:41:41

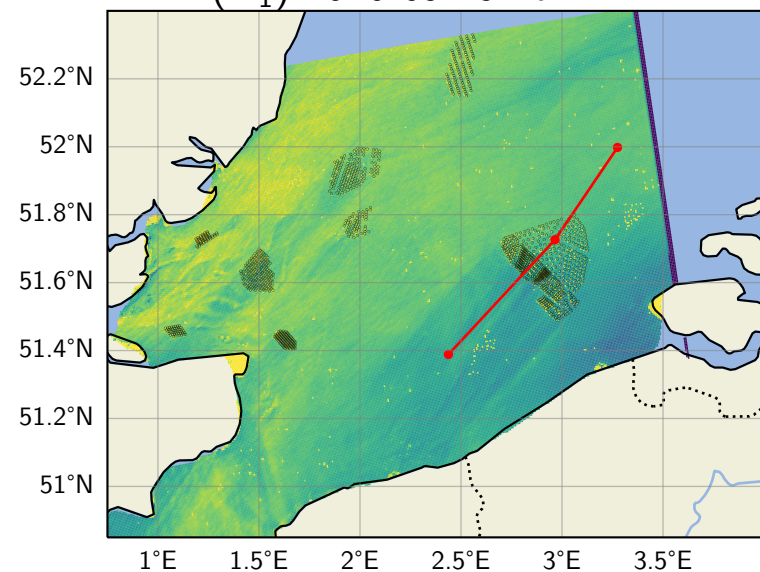

# WF simulations

(A<sub>2</sub>) 20-09-19 17:40:00

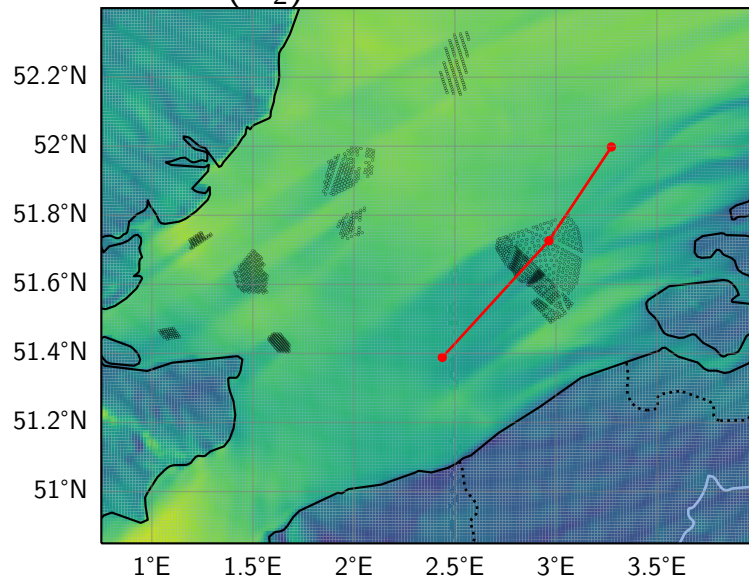

# NWF simulations

(A<sub>3</sub>) 20-09-19 17:40:00

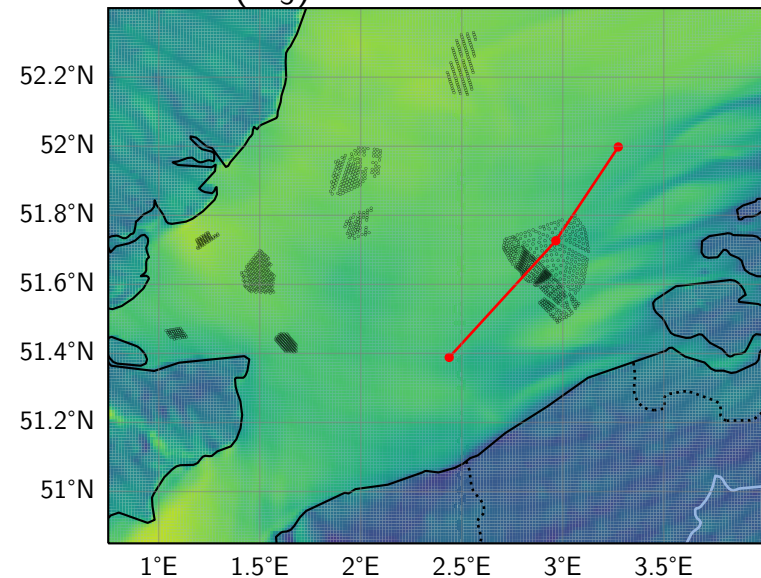

(B<sub>1</sub>) 2021-10-08 17:41:47

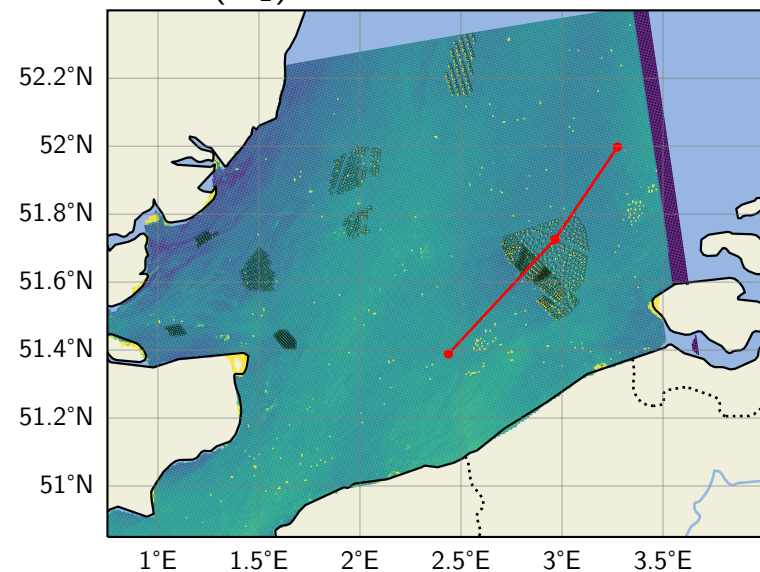

(B<sub>2</sub>) 21-10-08 17:40:00

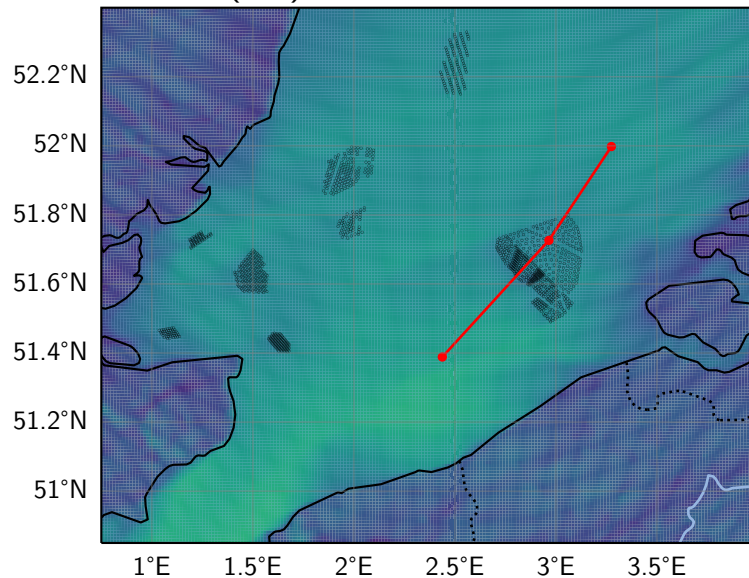

(B<sub>3</sub>) 21-10-08 17:40:00

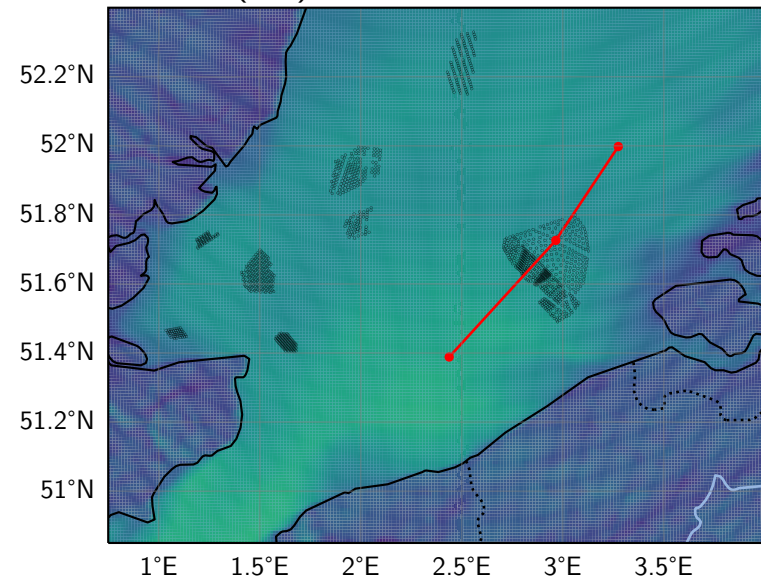

(C<sub>1</sub>) 2022-03-25 17:41:44

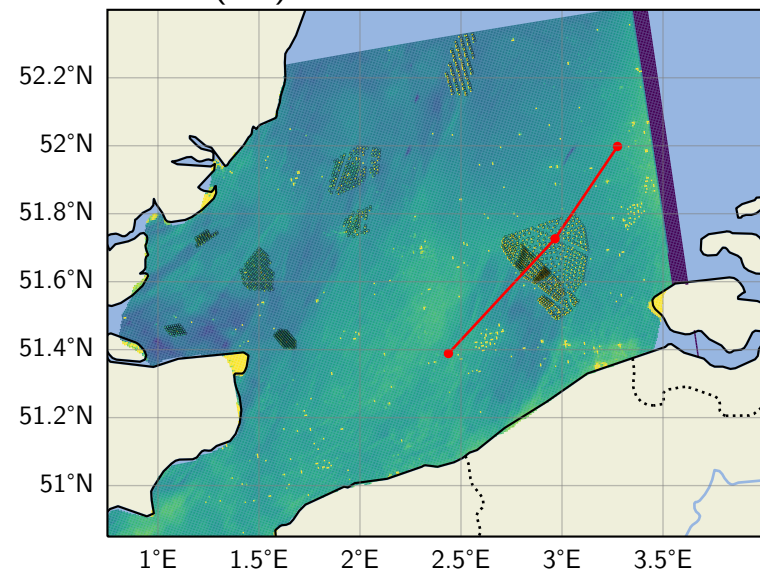

(C<sub>2</sub>) 22-03-25 17:40:00

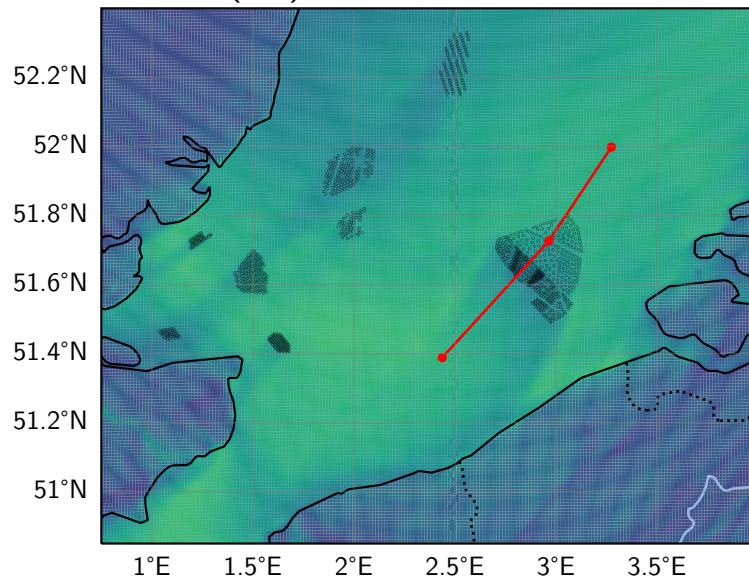

(C<sub>3</sub>) 22-03-25 17:40:00

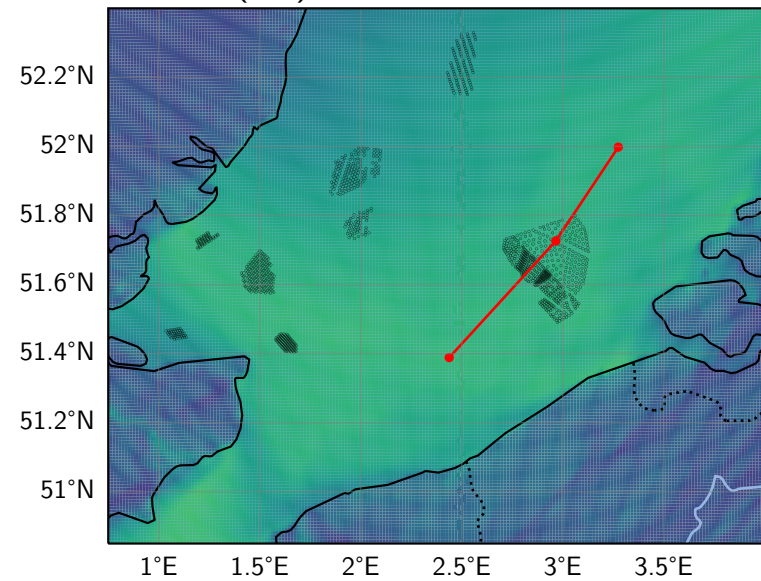

(D<sub>1</sub>) 2023-08-20 06:07:11

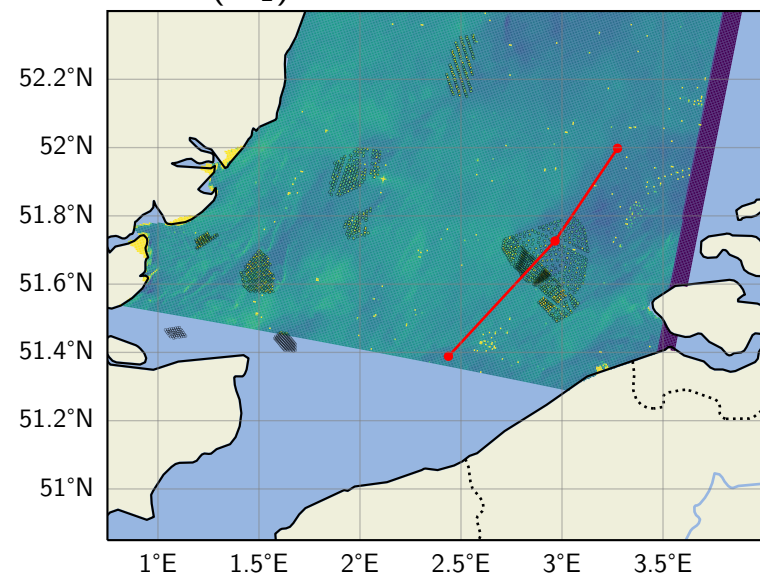

(D<sub>2</sub>) 23-08-20 06:10:00

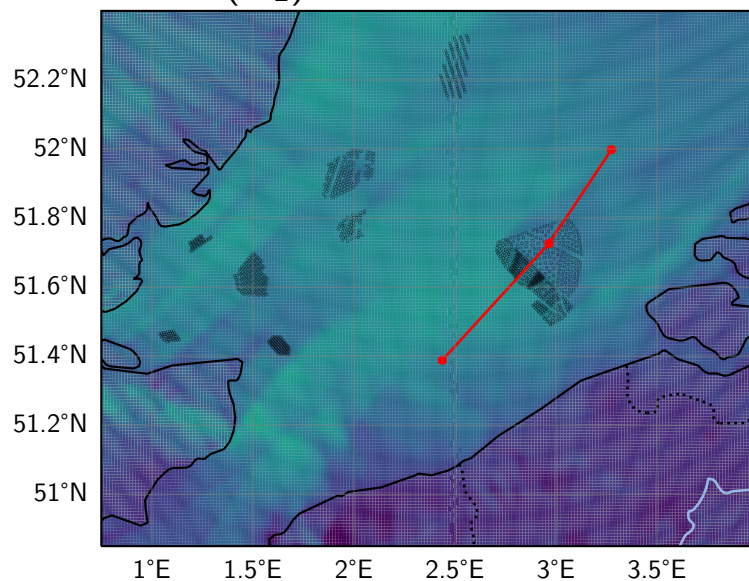

(D<sub>3</sub>) 23-08-20 06:10:00

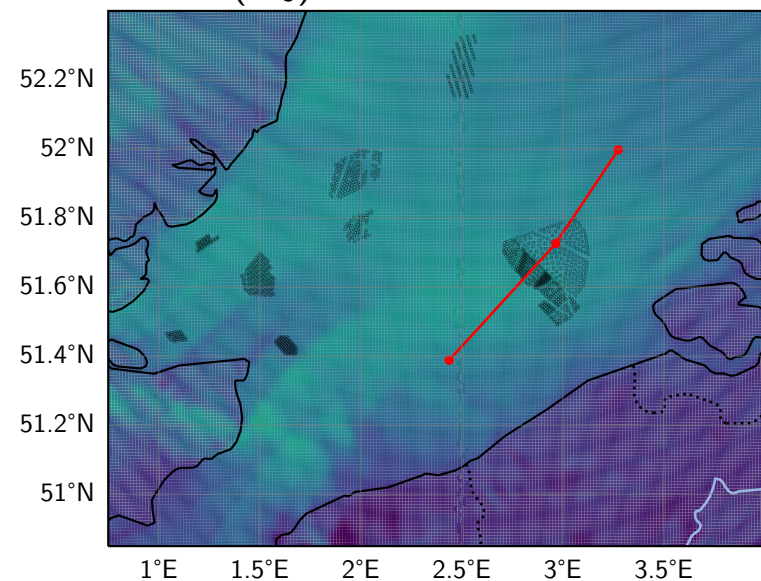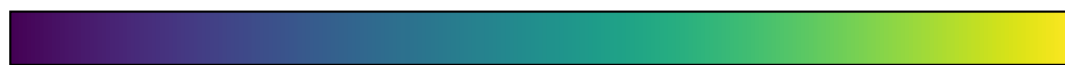

2

4

6

8

10

10m Wind Speed ( $ms^{-1}$ )
