# Supplementary figures and images for: Assessing the Accuracy of a Three-Year High-Resolution Mesoscale Wind Farm Wake Simulation with Lidar and Satellite Radar Data
Source: Copernicus journal article supplement (doi:10.5194/wes-2025-202), 2025-10-17

**(A<sub>1</sub>)** [3, 5) ( $ms^{-1}$ )

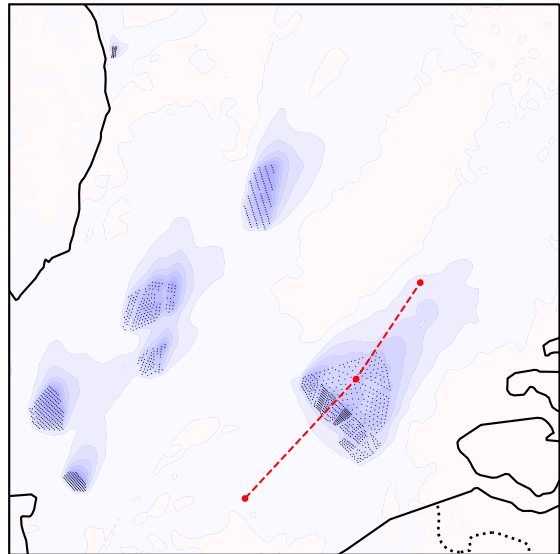

**(B<sub>1</sub>)** [5, 8) ( $ms^{-1}$ )

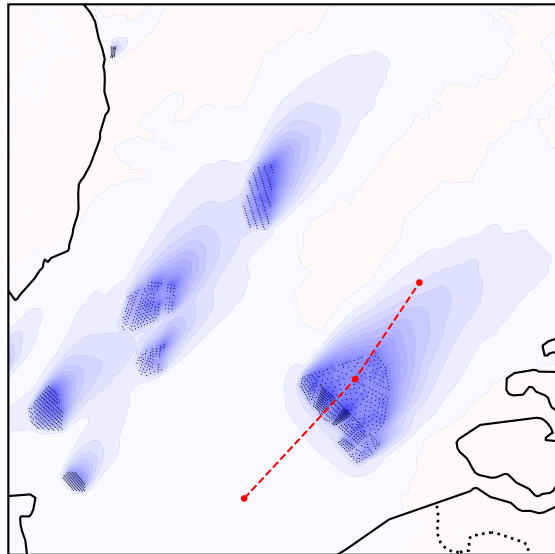

**(C<sub>1</sub>)** [8, 11) ( $ms^{-1}$ )

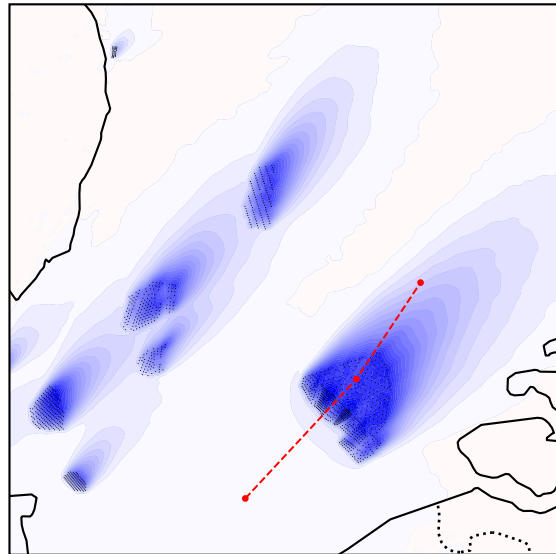

**(D<sub>1</sub>)** [11, 15) ( $ms^{-1}$ )

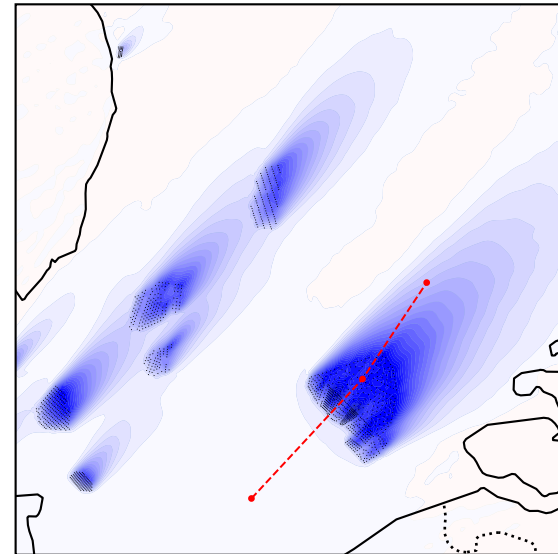

**(A<sub>2</sub>)** [3, 5) ( $ms^{-1}$ )

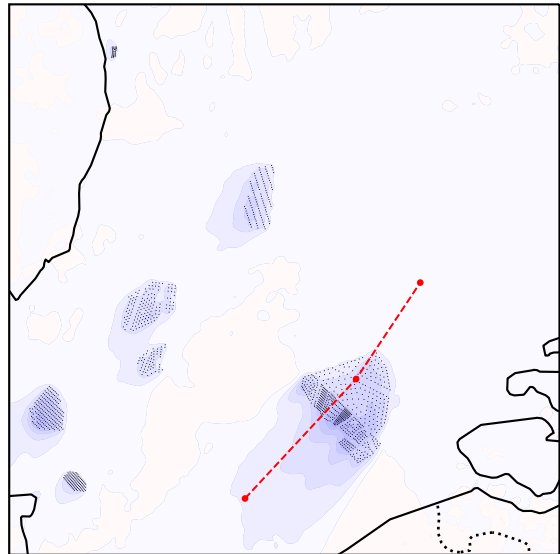

**(B<sub>2</sub>)** [5, 8) ( $ms^{-1}$ )

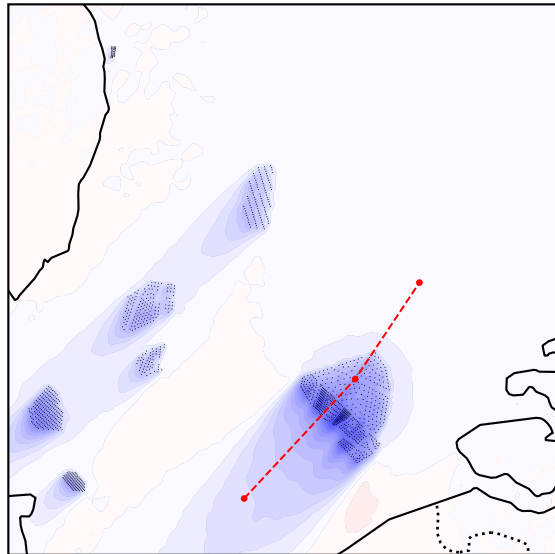

**(C<sub>2</sub>)** [8, 11) ( $ms^{-1}$ )

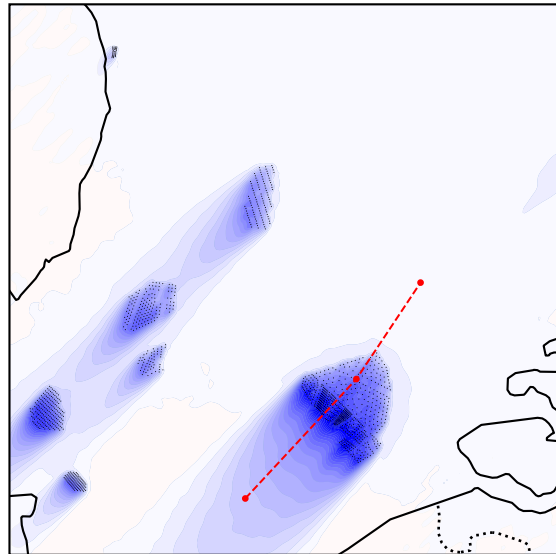

**(D<sub>2</sub>)** [11, 15) ( $ms^{-1}$ )

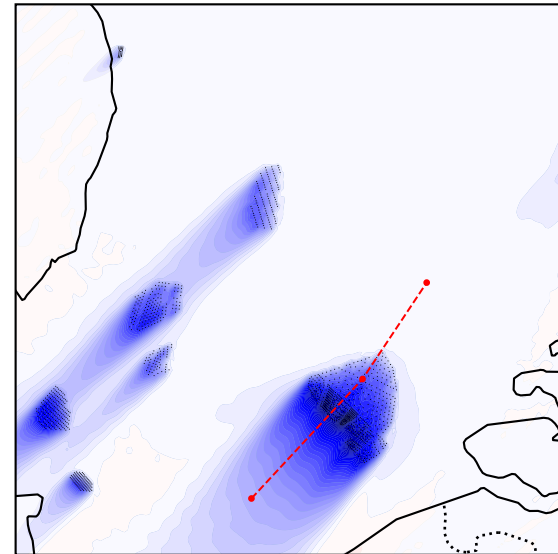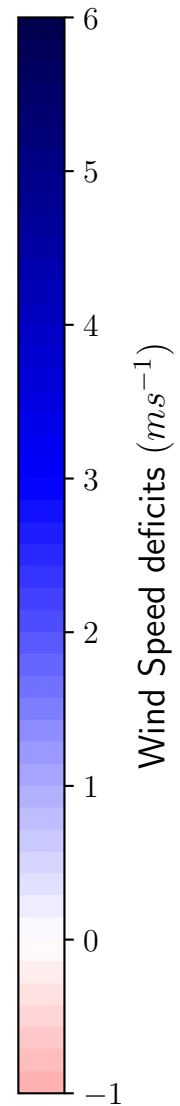

Supplement: Supplementary file 1 [file fig01.pdf › high-res-figs/fig01.pdf]
